# Supplementary material for: A vaccine targeting antigen-presenting cells through CD40 induces protective immunity against Nipah disease
Source: PubMed Central journal article supplement — Cell Rep Med. 2024 Mar 11;5(3):101467. doi: 10.1016/j.xcrm.2024.101467 (PMC10983108; doi:10.1016/j.xcrm.2024.101467), 2024-03-11
Supplement: mmc1.pdf [file mmc1.pdf]

**Supplemental information**

**A vaccine targeting antigen-presenting cells  
through CD40 induces  
protective immunity against Nipah disease**

**Yadira Pastor, Olivier Reynard, Mathieu Iampietro, Mathieu Surenaud, Florence Picard, Nora El Jahrani, Cécile Lefebvre, Adele Hammoudi, Léa Dupaty, Élise Brisebard, Stéphanie Reynard, Élodie Moureaux, Marie Moroso, Stéphanie Durand, Claudia Gonzalez, Lucia Amurri, Anne-Sophie Gallouët, Romain Marlin, Sylvain Baize, Eve Chevillard, Hervé Raoul, Hakim Hocini, Mireille Centlivre, Rodolphe Thiébaud, Branka Horvat, Véronique Godot, Yves Lévy, and Sylvain Cardinaud**

**A.**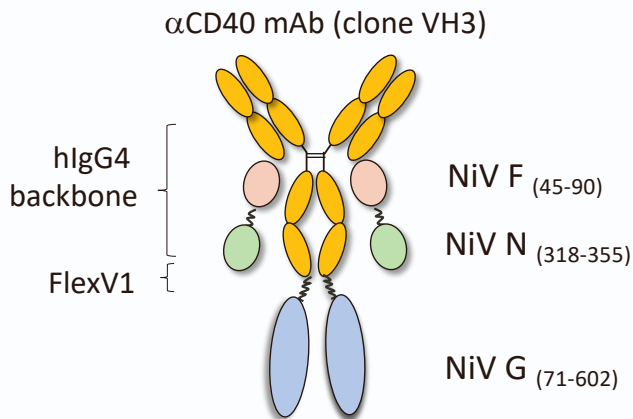**B.**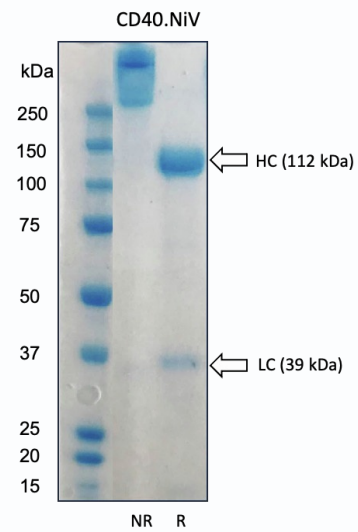**C.**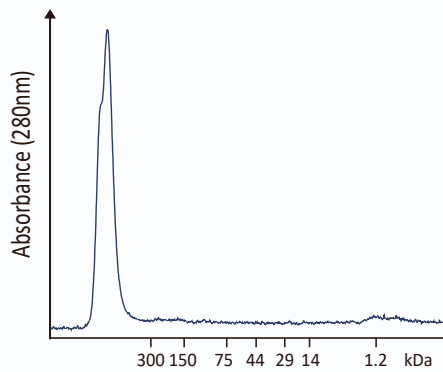**D.**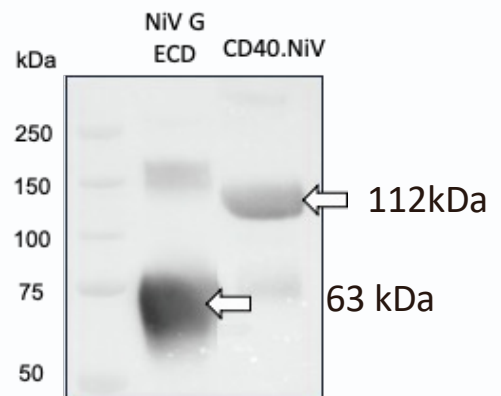

**Figure S1. Structure and quality control of the CD40.NiV vaccines. Related to Figure 1.** (A) Schematic representation of CD40.NiV. (B) SDS-PAGE profiles of non-reduced (NR) versus reduced (R) conditions. Molecular weight (kDa) markers are shown on the left. Arrows indicate the heavy chain (HC) and light chain (LC) of the vaccine. Sizes were predicted based on the amino acid composition. Given the glycosylated state of NiV G, bands are presented as predicted. (C) Size exclusion chromatography (SEC 10/300) of the vaccine (blue line). Standard protein molecular weight markers are indicated. The unique pic corresponding to the recombinant mAbs is indicated by the arrows. (D) Fusion of the NiV-B G ECD to the CD40.NiV vaccine was confirmed by western-blotting using sera from NiV-B G-immunized mice and testing the in-house produced NiV G ECD as a positive control (right).

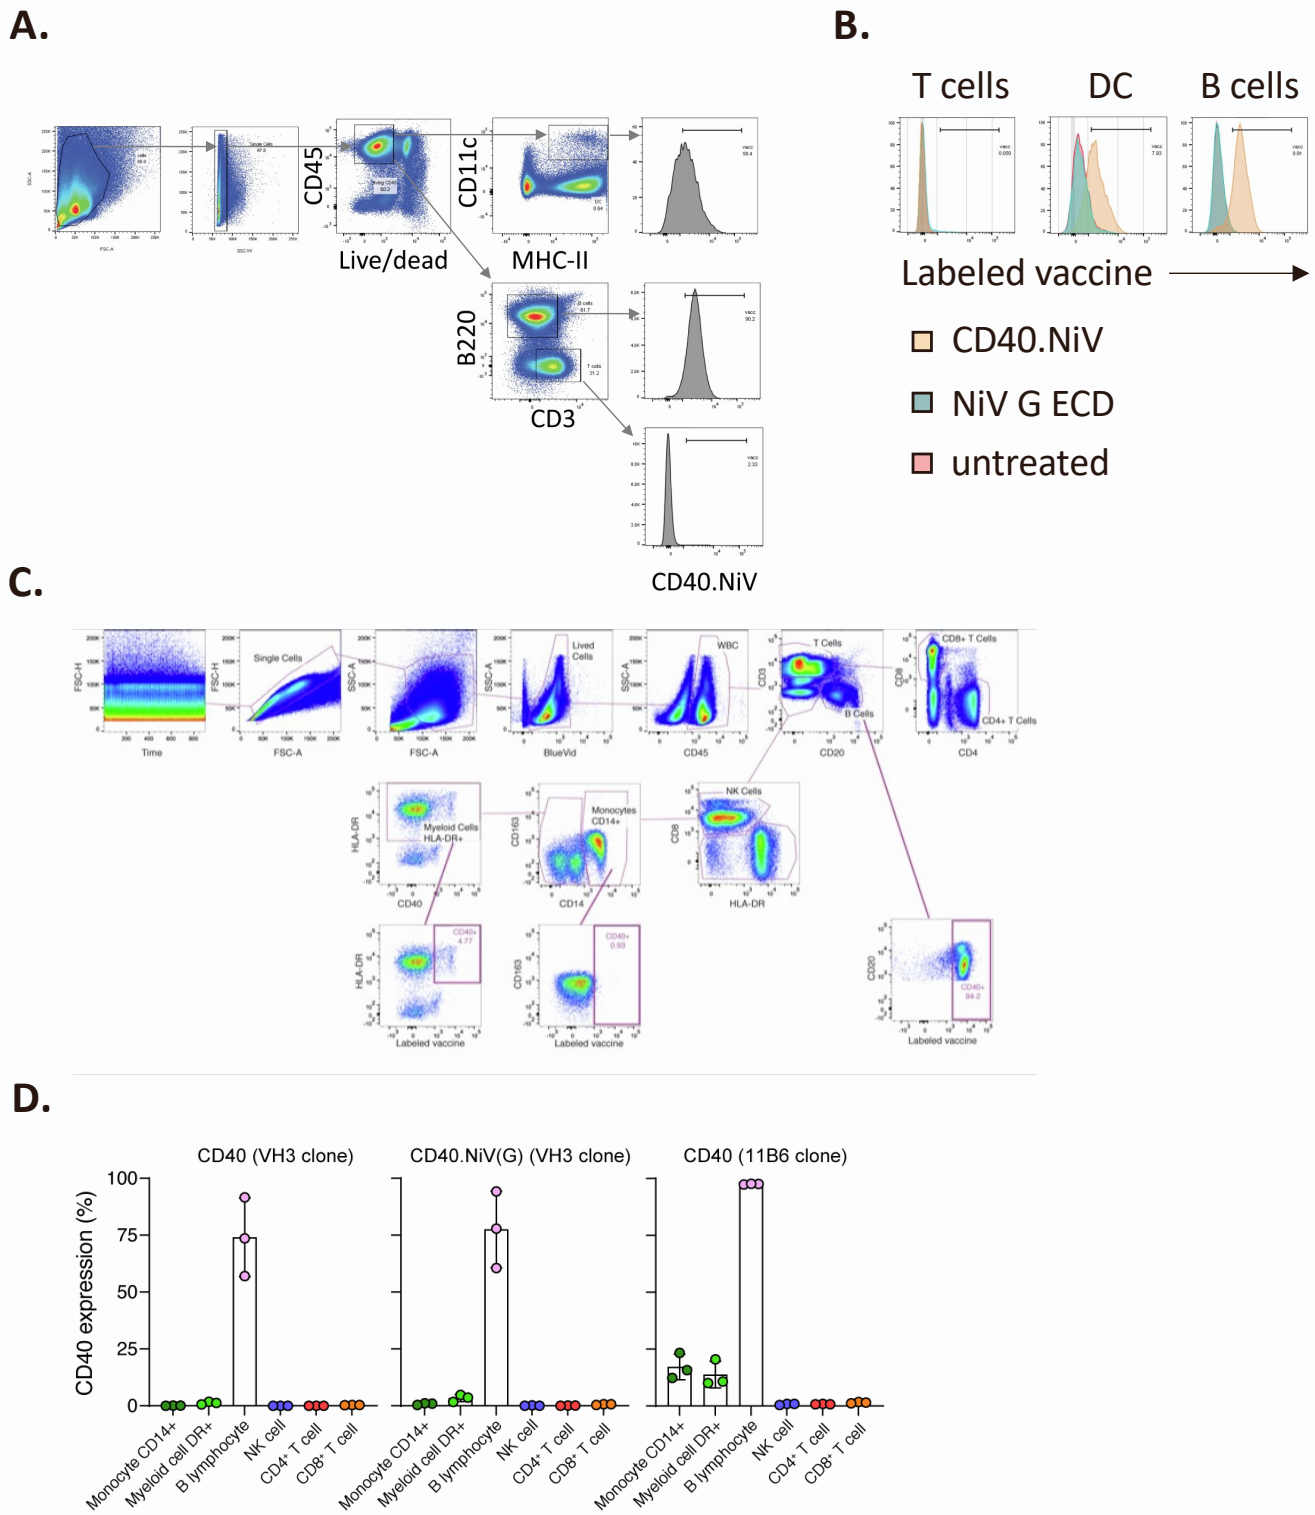

**Figure S2. CD40.NiV binds the human CD40 receptor. Related to Figure 1.** Splenocytes of hCD40Tg mice were incubated with 1 nM APC-labeled CD40.NiV (brown), non-targeting NiV G ECD (green), or untreated (salmon) and subsequently labeled for T-, B- and DC cell markers. **(A)** Gating strategy. T-cells were gated on CD45<sup>+</sup> CD3<sup>+</sup> cells, DC on CD11c<sup>+</sup>, MHC-II<sup>hi</sup> and B-cells on CD45<sup>+</sup> B220<sup>+</sup>. **(B)** Histogram (MFI) of labeled vaccines on each gated population. Graphs are representative of 2 experiments. **(C)** Same as A, using PBMCs from naïve African green monkeys (AGM) (n=3). Gating strategy. CD8<sup>+</sup> and CD4<sup>+</sup> T-cells were gated on CD3<sup>+</sup> cells, while B-cells were CD20<sup>+</sup>. Among CD3<sup>neg</sup>, NK cells were HLA-DR<sup>neg</sup> CD8<sup>+</sup>, while myeloid cells were distinguished from monocytes by HLA-DR and CD14 expression, respectively. **(D)** The original anti-CD40 clone (12E12/VH3) and another in-house-derived clone (11B6)<sup>53</sup> with no associated antigens were used as positive controls. Binding of the vaccine was demonstrated on B-cells, which express CD40, and to a lesser extent on monocyte/ myeloid DR<sup>+</sup> populations.

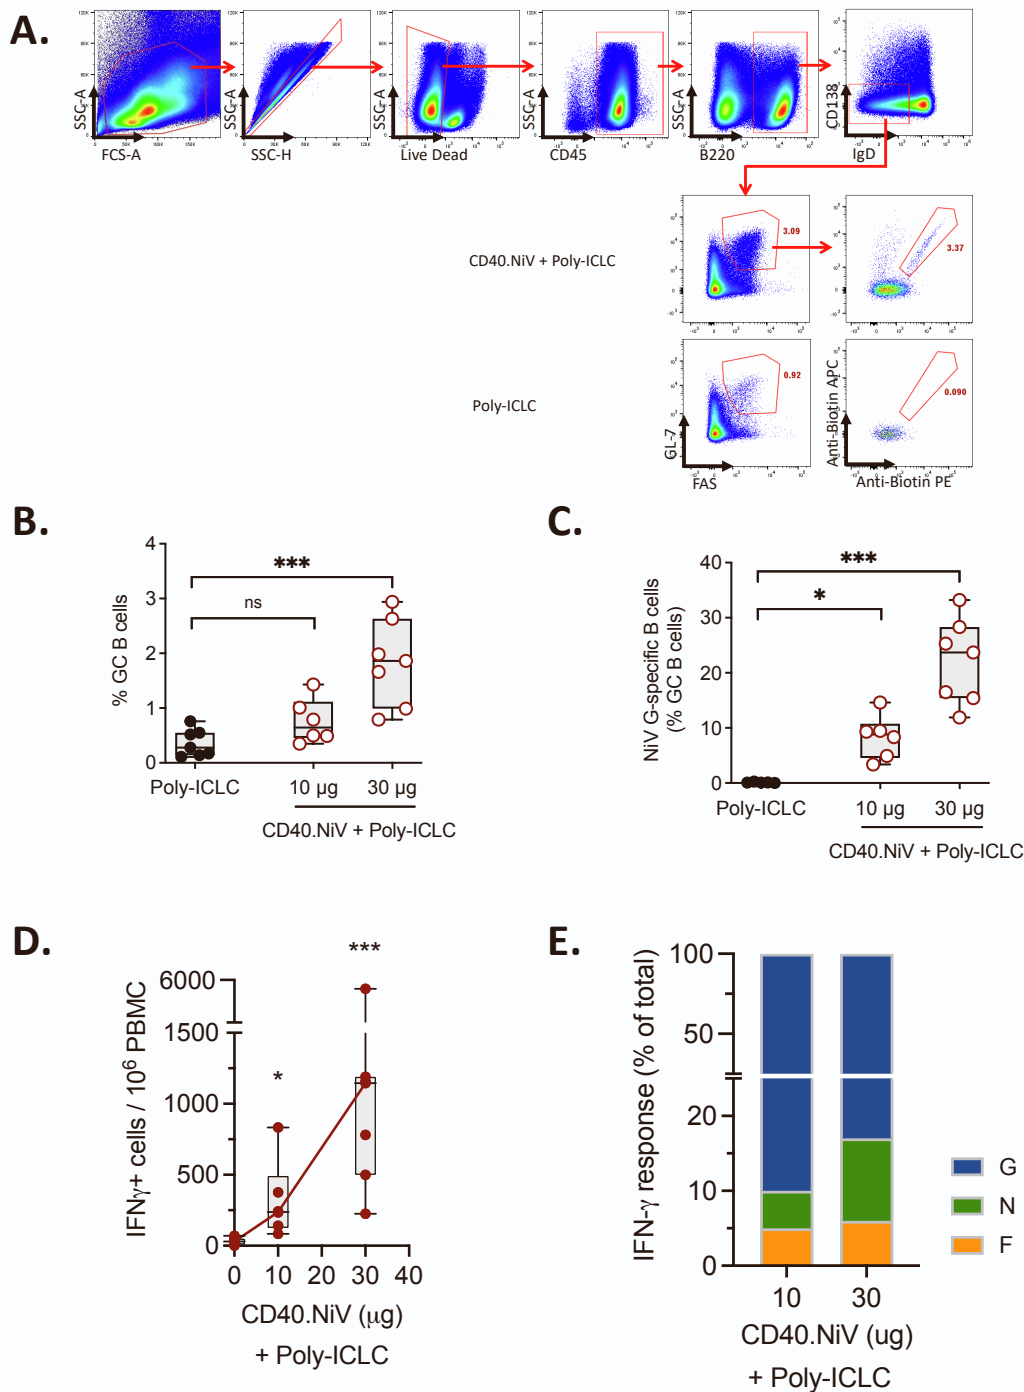

**Figure S3. Mouse NiV G-specific B- and T-cells responses in draining lymph nodes. Related to Figure 2. (A)** Mouse NiV G-specific B-cells were stained using biotinylated NiV G protein. Gating strategy. FAS<sup>+</sup> GL-7<sup>+</sup> germinal center (GC) B-cells were gated on B220<sup>+</sup>, IgD<sup>-</sup> CD138<sup>-</sup> cells, and NiV G-specific GC B-cells considered to be double positive for the anti-biotin staining. Representative dot plots of mice immunized with 10 µg of CD40.NiV (+Poly-ICLC) or with adjuvant alone are represented. **(B)** Percentage (%) of GC B-cells and **(C)** NiV G-specific B-cells among GC B-cells, in mice immunized with CD40.NiV (10 versus 30 µg, with Poly-ICLC) or Poly-ICLC alone. Non-parametric Kruskal-Wallis tests with Dunn's multiple comparison post-hoc test; \**P* < 0.05, \*\*\**P* < 0.001. **(D)** Dose dependent polyepitopic T-cells responses to CD40.NiV in hCD40Tg mice. As in Figure 2, IFN-γ T-cell responses to the NiV G, F, and N overlapping peptide pools assessed from spleens by ELISpot one week post-boost. Animals were immunized with 10 µg versus 30 µg of CD40.NiV with poly-ICLC and the responses compared to those of the poly-ICLC only negative group. The total number of spots are reported per million splenocytes (background subtracted). Non-parametric Kruskal-Wallis tests with Dunn's multiple comparison post-hoc test; \**P* < 0.05, \*\*\**P* < 0.001. **(E)** Percentage of NiV G (blue), N (green), and F (orange) peptide-specific IFN-γ responses for 10 and 30 µg of vaccine. Data are representative of at least two experiments.

**A.**

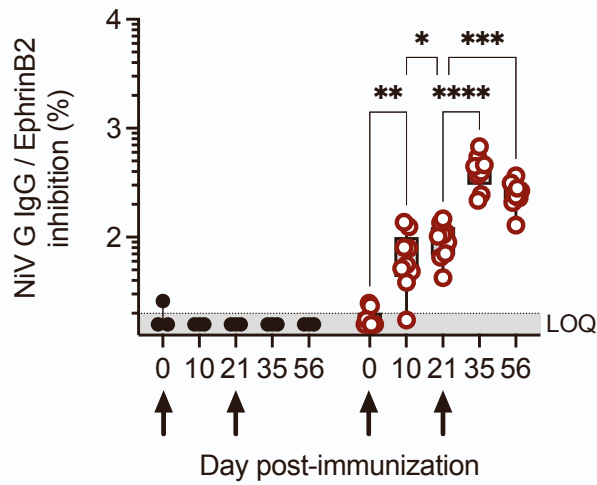

**B.**

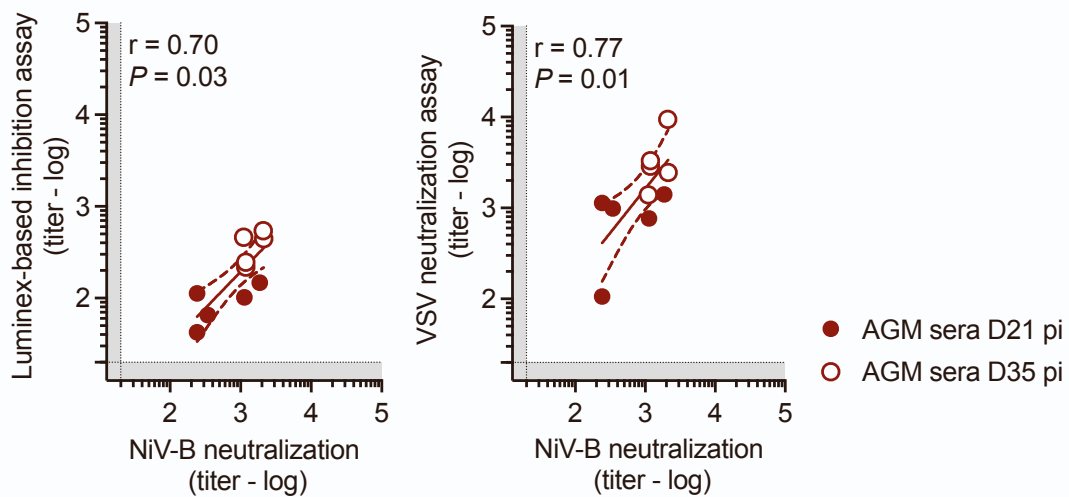

**Figure S4. Serum neutralization assay in AGMs Related to Figure 3.** (A) As in Figure 3, neutralization of AGM sera was confirmed using a Luminex-based inhibition assay on sequential time points. Non-parametric Kruskal-Wallis tests with Dunn's multiple comparison post-hoc test; \* $P < 0.05$ , \*\*  $P < 0.01$ , \*\*\*  $P < 0.001$ , \*\*\*\*  $P < 0.0001$ . (B) Neutralization titers evaluated in sera from CD40.NiV AGMs collected on days 21 and 35 post-immunization were correlated to titers evaluated by the Luminex-based inhibition assay (left) and the VSV (F/G) infection model (right).

**A.**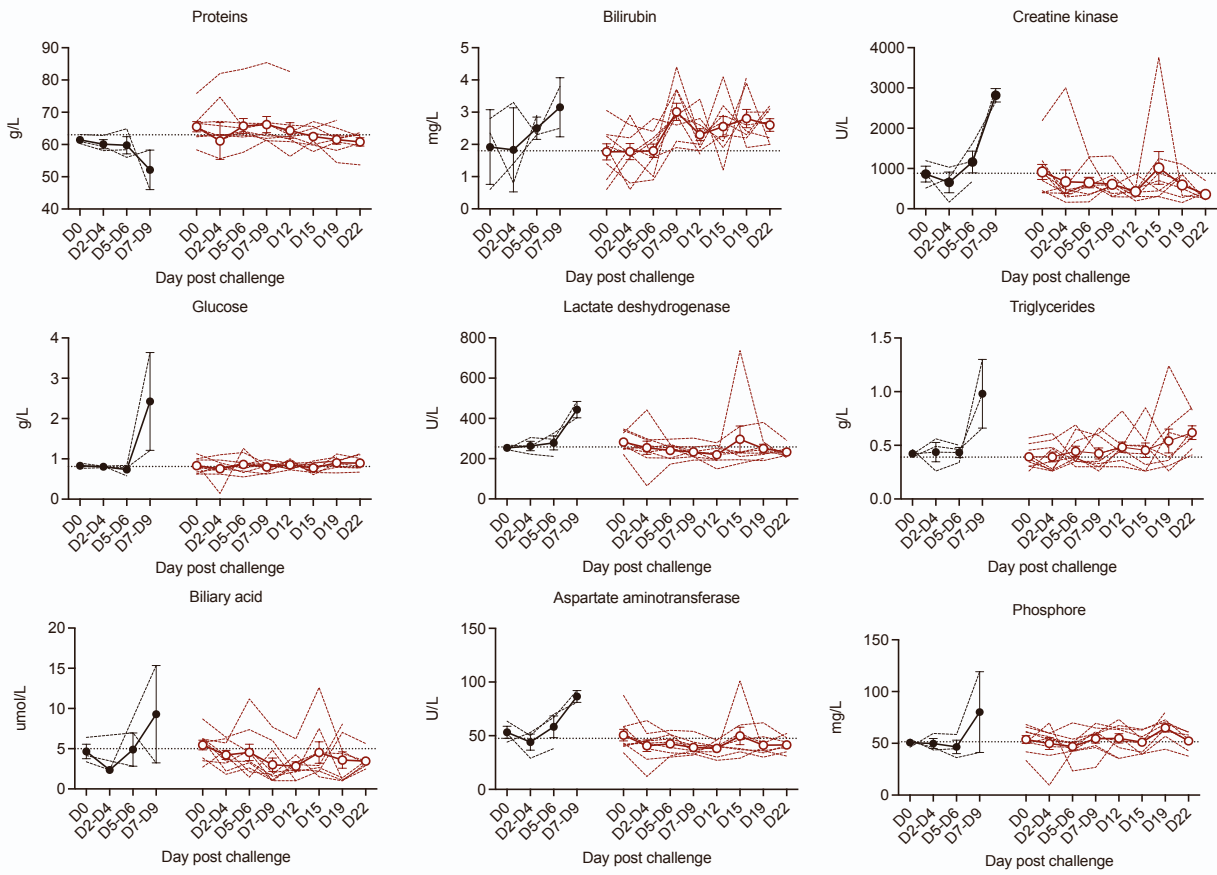**B.**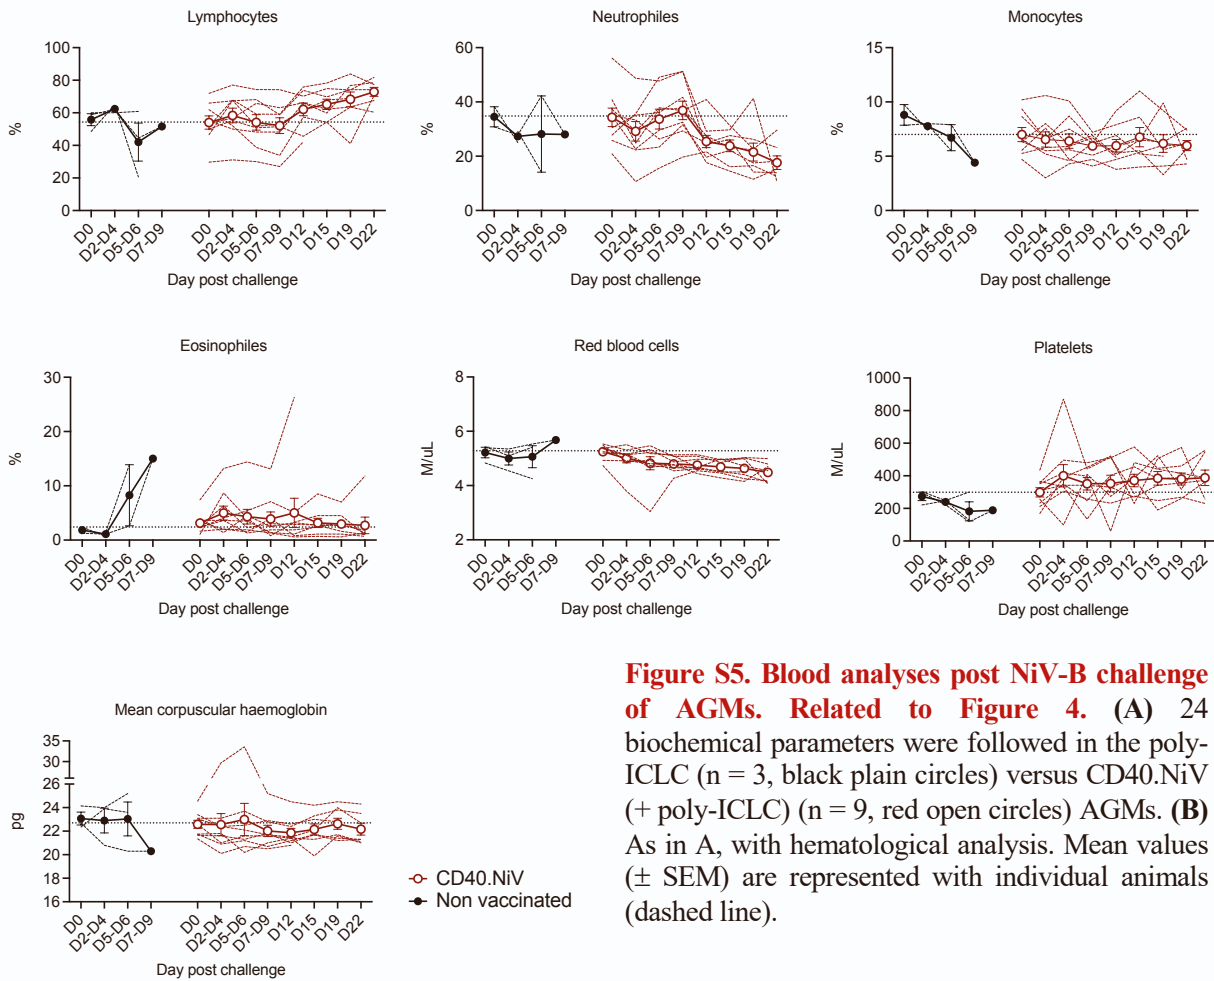

**Figure S5. Blood analyses post NiV-B challenge of AGMs. Related to Figure 4.** (A) 24 biochemical parameters were followed in the poly-ICLC (n = 3, black plain circles) versus CD40.NiV (+ poly-ICLC) (n = 9, red open circles) AGMs. (B) As in A, with hematological analysis. Mean values ( $\pm$  SEM) are represented with individual animals (dashed line).

**A.**

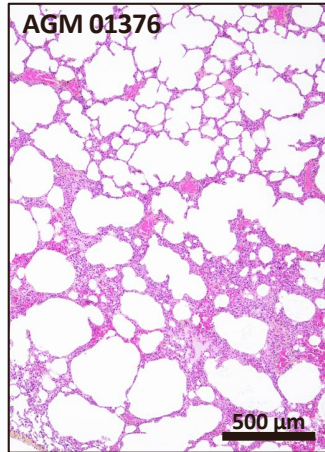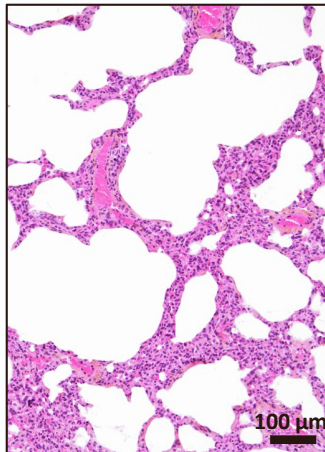

**B.**

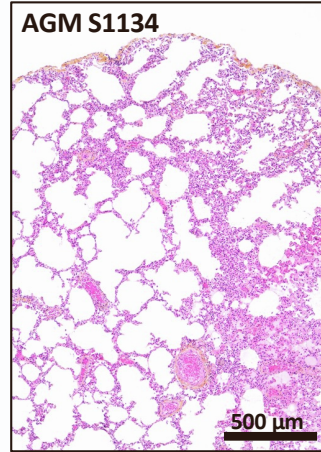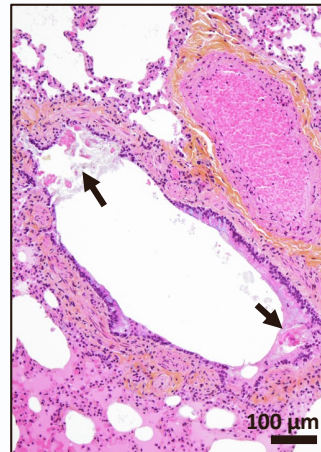

**Figure S6. Illustration of mild histopathological changes observed in the lungs of two vaccinated animals. Related to Figure 4.** Hematoxylin-eosin staining showed (A) traces of interstitial pneumonia (thickening of the alveolar septa by inflammatory cell infiltration, without syncytial formation) in AGM #O1376 and (B) traces of mucus in the bronchia (arrows) in AGM #S1134.

### A. D1 versus D0

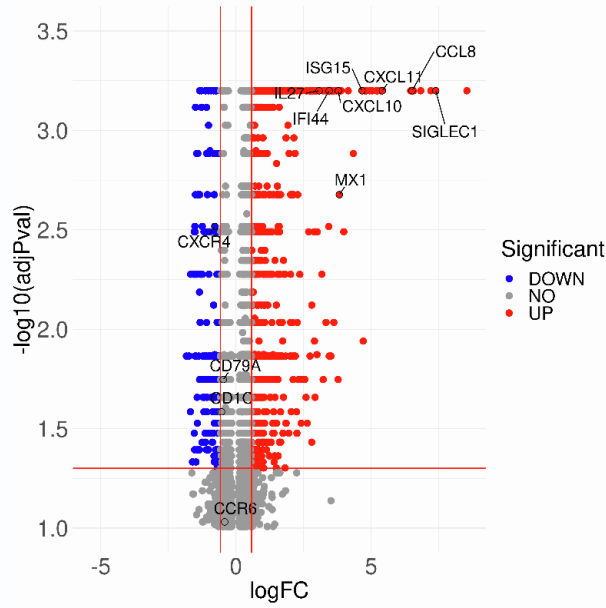

### D22 versus D21

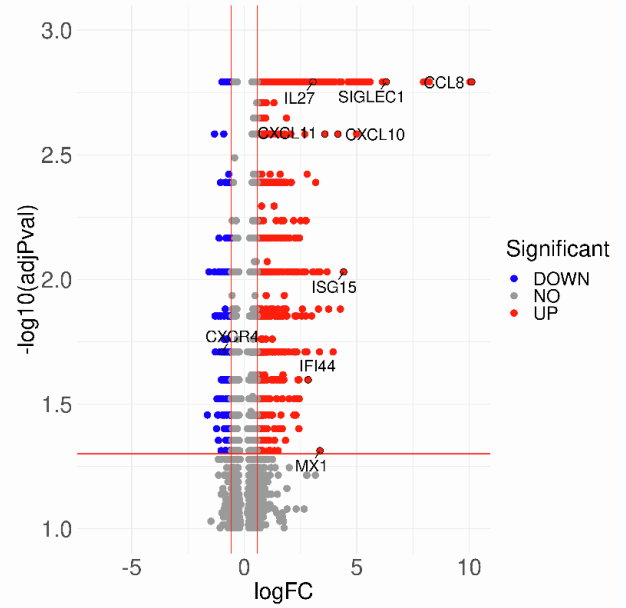

### B. D1 versus D0

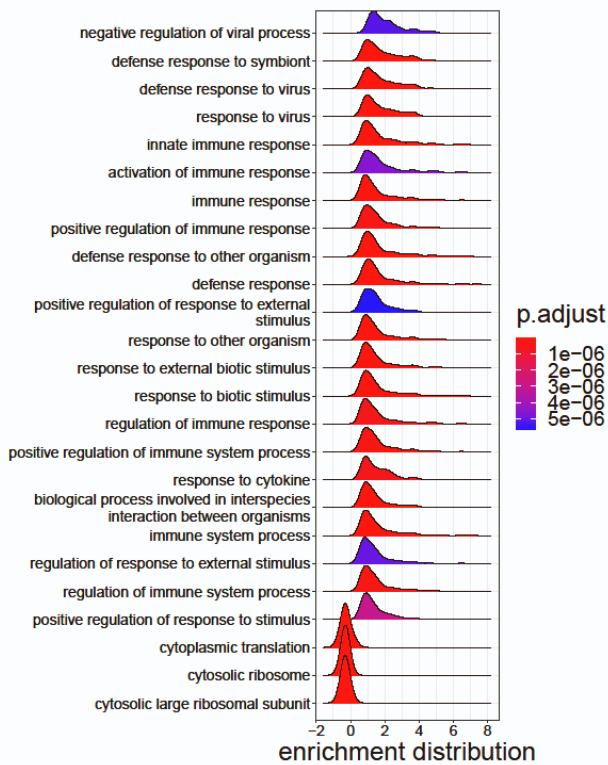

### D22 versus D21

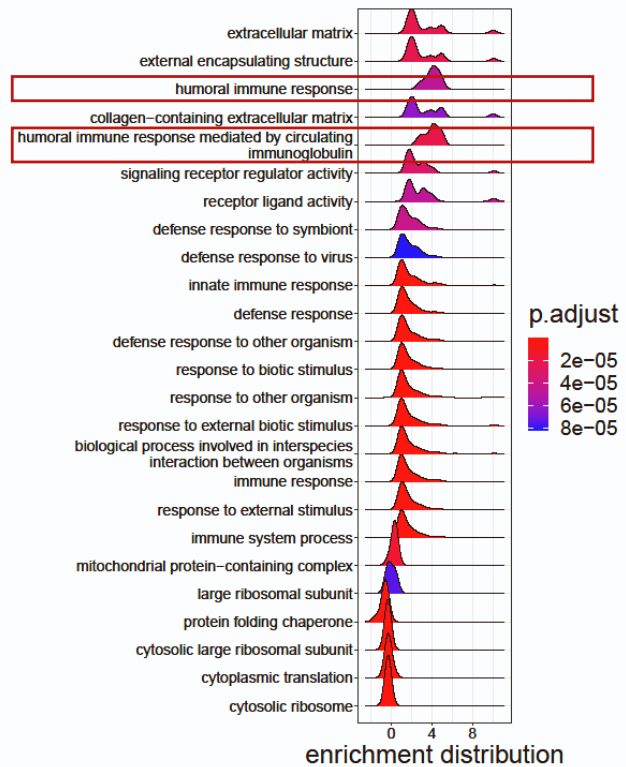

**Figure S7. Characterization of gene expression profiles post prime (D1 versus D0) and post boost (D22 versus D21). Related to Figure 7. (A)** Volcano plots of DEGs between D1 and D0 (left) and D22 and D21 (right). Down- and upregulated genes are shown in blue and red, respectively. The top 35 most upregulated and downregulated genes based on the log<sub>2</sub>FC are depicted. **(B)** Gene set enrichment analysis was performed on differentially expressed genes with an adjusted p-value ≤ 0.05 between D1 and D0 (left) and D22 and D21 (right) using the ClusterProfiler v4.4.4 R package. The density plot shows the top 25 pathways based on the adjusted p-value and normalized enrichment score.



**Table S1:** The amino acid sequences of the vaccine antigens and the mutations present between the tested strains of NiV-B, M, C, and HeV. **Related to Figure 1.**

### NiV G 71-602

|               |                                                                                                                       |
|---------------|-----------------------------------------------------------------------------------------------------------------------|
| (G ECD) NiV-B | QNYTRSTDNQAMIKDALQSIQQIKGLADKIGTEIGPKVSLIDTSSTITIPANIGLLGSKISQSTASINENVNEKCKFTLPPLKIHENICSNPLPFREYKQPTEGVSN 110       |
| (G ECD) NiV-M | QNYTRSTDNQAVIKDALQGIQQIKGLADKIGTEIGPKVSLIDTSSTITIPANIGLLGSKISQSTASINENVNEKCKFTLPPLKIHENICSNPLPFREYRPQTEGVSN 110       |
| (G ECD) NiV-C | QNYTRSTDNQAVIKDALQGIQQIKGLADKIGTEIGPKVSLIDTSSTITIPANIGLLGSKISQSTASINENVNEKCKFTLPPLKIHENICSNPLPFREYRPQTEGVSN 110       |
| (G ECD) HeV   | QNYTRITDQNALIKESLQSVQQIKALTDKIGTEIGPKVSLIDTSSTITIPANIGLLGSKISQSTSSINENVNDKCKFTLPPLKIHENICSNPLPFREYRPIISQGVSD 110      |
| (G ECD) NiV-B | LVGLPNNICLQKTSNQLKPKLISYTLPVVGGSGTCITDPLLAMDEGYFAYSHLEKIGSCSRGVSKQRIIGVGEVLDRGDEVPSLFMTNVWTPSPNPTVYHCSAVYNNF 220      |
| (G ECD) NiV-M | LVGLPNNICLQKTSNQLKPKLISYTLPVVGGSGTCITDPLLAMDEGYFAYSHLEKIGSCSRGVSKQRIIGVGEVLDRGDEVPSLFMTNVWTPSPNPTVYHCSAVYNNF 220      |
| (G ECD) NiV-C | LVGLPNNICLQKTSNQLKPKLISYTLPVVGGSGTCITDPLLAMDEGYFAYSHLEKIGSCSRGVSKQRIIGVGEVLDRGDEVPSLFMTNVWTPSPNPTVYHCSAVYNNF 220      |
| (G ECD) HeV   | LVGLPNQICLQKTTSTILKPRLISYTLPIINTEGVCITDPLLAVDNGFFAYSHLEKIGSCTRGIAKQRIIGVGEVLDRGDKVPSMFMTNVWTPSPNSTIHHCSSTYHEDF 220    |
| (G ECD) NiV-B | YYVLCASVVGDPILNSTYWSGSLMMTRLAVKPKNNGESYNQHQFALRNIEKGYDKVMPYGPSSGKQGDITLYFPAVGFLVRFTEFKYNDNSNCPAECQYKSPENCRLSMG 330    |
| (G ECD) NiV-M | YYVLCASVTVGDPILNSTYWSGSLMMTRLAVKPKSNGGGYNQHQALALRSIEKGRYDKVMPYGPSSGKQGDITLYFPAVGFLVRFTEFKYNDNSNCPITKCYKSPENCRLSMG 330 |
| (G ECD) NiV-C | YYVLCASVTVGDPILNSTYWSGSLMMTRLAVKPKSNDGGYNQHQALALRSIEKGRYDKVMPYGPSSGKQGDITLYFPAVGFLVRFTEFKYNDNSNCPITKCYKSPENCRLSMG 330 |
| (G ECD) HeV   | YYTLCASVHVGDPILNSTSWTESSLIRLAVRPKSDSGDYNQKYIAITKVERGKYDKVMPYGPSSGKQGDITLYFPAVGFLRTEFQYNDNSNCPIIHCKYSKAENCRLSMG 330    |
| (G ECD) NiV-B | IRPNSHYILRSGLLKYNLSDGENPKVVFIEISDQRLSIGSPSKIYDSLQGPVVFYQASFSWDTMIKFGDVQTVNPLVVNWRDNTVISRPGSQCPFRFNKCEVCEWGVYND 440    |
| (G ECD) NiV-M | IRPNSHYILRSGLLKYNLSDGENPKVVFIEISDQRLSIGSPSKIYDSLQGPVVFYQASFSWDTMIKFGDVLTVNPLVVNWRNNTVISRPGSQCPFRNTPCEICWEGVYND 440    |
| (G ECD) NiV-C | IRPNSHYVLRSGLLKYNLSDGENPKIVFIEISDQRLSIGSPSKIYDSLQGPVVFYQASFSWDTMIKFGDVQTVNPLVVSWRDNTVISRPGSQCPFRNTPCEICWEGVYND 440    |
| (G ECD) HeV   | YVNSKSHYILRSGLLKYNLSDGGDIILQFIEIADNRLTIGSPSKIYNSLQGPVVFYQASVSWDTMIKLGDDVTDVPLRVQWRNNSVISRPGSQCPFRNVCEVCEWGTYND 440    |
| (G ECD) NiV-B | AFLIDRINWISAGVFLDSNQTAEENPVFTVFKDNEVLYRAQLASEDTNAQKTIITNCFLLNKNIWCISLVEIYDTGDNVIRPKLFAVKIPEQCT-- 532                  |
| (G ECD) NiV-M | AFLIDRINWISAGVFLDSNQTAEENPVFTVFKDNEILYRAQLASEDTNAQKTIITNCFLLNKNIWCISLVEIYDTGDNVIRPKLFAVKIPEQCT-- 532                  |
| (G ECD) NiV-C | AFLIDRINWISAGVFLDSNQTAEENPVFTVFKDNEILYRAQLASEDTNAQKTIITNCFLLNKNIWCISLVEIYDTGDNVIRPKLFAVKIPEQCT-- 532                  |
| (G ECD) HeV   | AFLIDRLNWSAGVYLNNSNQTAEENPVFAVFKDNEILYQVPLAEDDTNAQKTIITDCFLLENVIWCISLVEIYDTGDSVIRPKLFAVKIAPAQCSSES 534                |

### NiV F 45-90

|              |                                                   |
|--------------|---------------------------------------------------|
| (Fpep) NiV-B | KYKIKSNPLTKDIVIKMIPNVSNMSQCTGSMENYKTRLNGILTPI 46  |
| (Fpep) NiV-M | KYKIKSNPLTKDIVIKMIPNVSNMSQCTGSMENYKTRLNGILTPI 46  |
| (Fpep) NiV-C | KYKIKSNPLTKDIVIKMIPNVSNMSQCTGSMENYKTRLNGILTPI 46  |
| (Fpep) HeV   | KYKIKSNPLTKDIVIKMIPNVSNVSKCTGTVMENYKSRLTGILSPI 46 |

### NiV N 318-355

|              |                                           |
|--------------|-------------------------------------------|
| (Npep) NiV-B | IQTKFAPGGYPLLWSFAMGVATTIDRSMGALNINRGYL 38 |
| (Npep) NiV-M | IQTKFAPGGYPLLWSFAMGVATTIDRSMGALNINRGYL 38 |
| (Npep) NiV-C | IQTKFAPGGYPLLWSFAMGVATTIDRSMGALNINRGYL 38 |
| (Npep) HeV   | IQTKFAPGGYPLLWSFAMGVATTIDRSMGALNINRGYL 38 |

**Table S2: Pools of overlapping peptides. Related to Figure 2**

| NiV G ECD |          |                  |           |          |                   |           |          |                  |
|-----------|----------|------------------|-----------|----------|-------------------|-----------|----------|------------------|
| Peptide # | Position | AA sequence      | Peptide # | Position | AA sequence       | Peptide # | Position | AA sequence      |
| 1         | 61       | VIIVMNIMI IQNYTR | 44        | 233      | HLERIGSCSRGVSKQ   | 89        | 413      | LLKYNLSDGENPKVV  |
| 2         | 65       | MNIMI IQNYTRSTDN | 45        | 237      | IGSCSRGVSKQRIIG   | 90        | 417      | NLSDGENPKVVFIEI  |
| 3         | 69       | IQNYTRSTDNQAVI   | 46        | 241      | SRGVSKQRIIGVGEV   | 91        | 421      | GENPKVVFIEISDQR  |
| 4         | 73       | YTRSTDNQAVIKDAL  | 47        | 245      | SKQRIIGVGEVLDRG   | 92        | 425      | KVVFIEISDQRLSIG  |
| 5         | 77       | TDNQAVIKDALQGIQ  | 48        | 249      | IIGVGEVLDRGDEVP   | 93        | 429      | IEISDQRLSIGSPSK  |
| 6         | 81       | AVIKDALQGIQQQIK  | 49        | 253      | GEVLDRGDEVPVSLFM  | 94        | 433      | DQRLSIGSPSKIYDS  |
| 7         | 85       | DALQGIQQQIKGLAD  | 50        | 257      | DRGDEVPVSLFMNTVW  | 95        | 437      | SIGSPSKIYDSLQGP  |
| 8         | 89       | GIQQQIKGLADKIGT  | 51        | 261      | EVPSLFMNTVWTPPN   | 96        | 441      | PSKIYDSLQGPVFIQ  |
| 9         | 93       | QIKGLADKIGTEIGP  | 52        | 265      | LFMTNVWTPPNNTV    | 97        | 445      | YDSLQGPVFIQASFS  |
| 10        | 97       | LADKIGTEIGPKVSL  | 53        | 269      | NVWTPPNNTVYHCS    | 98        | 449      | GQPVFIQASFSWDTM  |
| 11        | 101      | IGTEIGPKVSLIDTS  | 54        | 273      | PPNPNTVYHCSAVYN   | 99        | 453      | FYQASFSWDTMIKFG  |
| 12        | 105      | IGPKVSLIDTSSTIT  | 55        | 277      | NTVYHCSAVYNNEFY   | 100       | 457      | SFSWDTMIKFGDVLT  |
| 13        | 109      | VSLIDTSSTITIPAN  | 56        | 281      | HCSAVYNNEFYVLC    | 101       | 461      | DTMIKFGDVLTVNNPL |
| 14        | 113      | DTSSSTITIPANIGLL | 57        | 285      | VYNNEFYVLCVAVST   | 102       | 465      | KFGDVLTVNNPLVNNW |
| 15        | 117      | TITIPANIGLLGSKI  | 58        | 289      | EFYVLCVAVSTVGDP   | 103       | 469      | VLTVNNPLVNNWRNNT |
| 16        | 121      | PANIGLLGSKISQST  | 59        | 293      | VLCVAVSTVGDPILNS  | 104       | 473      | NPLVNNWRNNTVISR  |
| 17        | 125      | GLLGSKISQSTASIN  | 60        | 297      | VSTVGDPILNSTYWS   | 105       | 477      | VNWRNNTVISRPGQS  |
| 18        | 129      | SKISQSTASINENVN  | 61        | 301      | GDPILNSTYWSGSLM   | 106       | 481      | NNTVISRPGQSQPCR  |
| 19        | 133      | QSTASINENVNEKCK  | 62        | 305      | LNSTYWSGSLMTRL    | 107       | 485      | ISRPQSQCPRENTC   |
| 20        | 137      | SINENVNEKCKFTLP  | 63        | 309      | YWSGSLMTRLAVKP    | 108       | 489      | GQSQCPRENTCPEIC  |
| 21        | 141      | NVNEKCKFTLPPLKI  | 64        | 313      | SLMTRLAVKPKSNG    | 109       | 493      | CPRENTCPEICWEGV  |
| 22        | 145      | KCKFTLPPLKIHECN  | 65        | 317      | TRLAVKPKSNGGGYN   | 110       | 497      | NTCPEICWEGVYNDA  |
| 23        | 149      | TLPLPKIHECNISCP  | 66        | 321      | VKPKSNGGGYNQHQL   | 111       | 501      | EICWEGVYNDAFLID  |
| 24        | 153      | LKIHECNISCPNPLP  | 67        | 325      | SNGGGYNQHQLALRS   | 112       | 505      | EGVYNDAFLIDRINW  |
| 25        | 157      | ECNISCPNPLPFREY  | 68        | 329      | GYNQHQLALRSIEKG   | 113       | 509      | NDAFLIDRINWISAG  |
| 26        | 161      | SCPNPLPFREYRPQT  | 69        | 333      | HQLALRSIEKGRYDK   | 114       | 513      | LIDRINWISAGVFLD  |
| 27        | 165      | PLPFREYRPQTEGVS  | 70        | 337      | LSIEKGRYDKVMPY    | 115       | 517      | INWISAGVFLDSNQT  |
| 28        | 169      | REYRPQTEGVSNLVG  | 71        | 341      | EKGRYDKVMPYGPSG   | 116       | 521      | SAGVFLDSNQTAEENP |
| 29        | 173      | PQTEGVSNLVGLPNN  | 72        | 345      | YDKVMPYGPSGIKQG   | 117       | 525      | FLDSNQTAEENPVFTV |
| 30        | 177      | GVSNLVGLPNNICLQ  | 73        | 349      | MPYGPSGIKQGDITLY  | 118       | 529      | NQTAENPVFTVFKDN  |
| 31        | 181      | LVGLPNNICLQKTSN  | 74        | 353      | PSGIKQGDITLYFPAV  | 119       | 533      | ENPVFTVFKDNEILY  |
| 32        | 185      | PNNICLQKTSNQILK  | 75        | 357      | KQGDITLYFPAVGFLV  | 120       | 537      | FTVFKDNEILYRAQL  |
| 33        | 189      | CLQKTSNQILKPKLI  | 76        | 361      | TLYFPAVGFLVRFTEF  | 121       | 541      | KDNEILYRAQLASED  |
| 34        | 193      | TSNQILKPKLISYTL  | 77        | 365      | PAVGFLVRFTEFKYND  | 122       | 545      | ILYRAQLASEDTNAQ  |
| 35        | 197      | ILKPKLISYTLPVVG  | 78        | 369      | FLVRFTEFKYNDNSNC  | 123       | 549      | AQLASEDTNAQKIT   |
| 36        | 201      | KLISYTLPVVQSGT   | 79        | 373      | TEFKYNDNSNCPITKC  | 124       | 553      | SEDNAQKITITNCFL  |
| 37        | 205      | YTLPVVQSGTCTITD  | 80        | 377      | YDNSNCPITKCQYSK   | 125       | 557      | NAQKITITNCFLKKNK |
| 38        | 209      | VVGQSGTCTITDPLLA | 81        | 381      | NCPITKCQYSKPENC   | 126       | 561      | TITNCFLKKNKIWCI  |
| 39        | 213      | SGTCTITDPLLAMDEG | 82        | 385      | TKCQYSKPENCRLSM   | 127       | 565      | CFLKKNKIWCISLVE  |
| 40        | 217      | ITDPLLAMDEGYFAY  | 83        | 389      | YSKPENCRLSMGIKQ   | 128       | 569      | KNKIWCISLVEIYDT  |
| 41        | 221      | LLAMDEGYFAYSHLE  | 84        | 393      | ENCRLSMGIKQIRNSHY | 129       | 573      | WCISLVEIYDTGDNV  |
| 42        | 225      | DEGYFAYSHLERIGS  | 85        | 397      | LSMGIKQIRNSHYILRS | 130       | 577      | LVEIYDTGDNVIRPK  |
| 43        | 229      | FAYSHLERIGSCSRG  | 86        | 401      | IRPNSHYILRSGLLK   | 131       | 581      | YDTGDNVIRPKLFAV  |
|           |          |                  | 87        | 405      | SHYILRSGLLKYNLS   | 132       | 585      | DNVIRPKLFAVKIPE  |
|           |          |                  | 88        | 409      | LRSGLLKYNLSGDEN   | 133       | 588      | IRPKLFAVKIPEQCT  |

| NiV F peptide |          |                  | NiV N peptide |          |                 |
|---------------|----------|------------------|---------------|----------|-----------------|
| Peptide #     | Position | AA sequence      | Peptide #     | Position | AA sequence     |
| 1             | 1        | KYKIKSNPLTKDIVI  | 1             | 1        | IQTKFAPGGYPLLWS |
| 2             | 5        | KSNPLTKDIVIKMIP  | 2             | 5        | FAPGGYPLLWSFAMG |
| 3             | 9        | LTKDIVIKMIPNVSN  | 3             | 9        | GYPLLWSFAMGVATT |
| 4             | 13       | IVIKMIPNVSNMSSQC | 4             | 13       | LWSFAMGVATTIDRS |
| 5             | 17       | MIPNVSNMSSQCTGSV | 5             | 17       | AMGVATTIDRSMGAL |
| 6             | 21       | VSNMSQCTGSVMENY  | 6             | 21       | ATTIDRSMGALNINR |
| 7             | 25       | SQCTGSVMENYKTRL  | 7             | 24       | IDRSMGALNINRGYL |
| 8             | 29       | GSMENYKTRLNGLI   |               |          |                 |
| 9             | 33       | MENYKTRLNGLTPI   |               |          |                 |
